# Supplementary material for: Combined therapy of pulsed radiofrequency and nerve block in postherpetic neuralgia patients: a randomized clinical trial
Source: PeerJ. 2018 Jun 4;6:e4852. doi: 10.7717/peerj.4852 (PMC5991296; doi:10.7717/peerj.4852)
Supplement: Supplemental Information 3 [file peerj-06-4852-s003.xls]

## Sheet: data1
C arm
rest VAS		active VAS				SP		EP		IL-6		response
before	after	before	after			before	after	before	after	before	after	before	after
9	5	10	6			423	300	109.6	225	146.9	99.6	10	6
8	5	9	5			376.1	250.6	123.8	236.5	144.2	92.6	9	6
8	4	9	4			374	250	120.6	262	139.6	90.8	9	5
8	4	8	5			363.3	221.5	117	191.7	135.8	90.5	9	5
7	4	8	4			350.6	218.4	125.2	225.4	134.7	88.7	9	5
7	5	8	5			333.9	212.8	135	180	132.6	87.9	8	5
7	6	9	6			360.2	220.1	162.5	186.1	134.9	89.9	8	5
8	5	9	5			380.6	251.2	108.6	234.2	141.8	91.6	9	4
9	6	10	6			420	256.7	96.7	170.2	146.7	98.6	9	5
9	6	10	6			400.1	253.2	100.7	167	145.9	95.4	10	4
7	5	8	5			316.9	200.1	126.5	165.7	130	86.3	10	3
8	4	9	6			370.7	241.2	115.8	155.6	141.3	91.2	10	5
6	5	7	6			300.2	198.6	195	201.43	129.9	84.4	8	4
8	4	9	5			365.5	240.3	112.5	259.1	140.7	90.8	9	5
7	4	9	5			330.9	200.4	135.6	158.7	131.8	86.5	8	4
TD arm
rest VAS		active VAS				SP		EP		IL-6		response
before	after	before	after			before	after	before	after	before	after	before	after
8	4	9	4			327.5	156.2	124.5	255.3	136.6	61.2	10	4
9	4	10	5			425.6	171.4	95.9	200.9	149	69.7	9	4
8	4	9	4			356.1	160.7	111.3	220.1	135.9	59.9	8	4
9	3	10	4			408.5	172.3	110.2	217.3	138.5	63.7	8	3
7	3	9	3			316.4	141.3	144.6	267.8	130.9	58.6	8	4
7	4	8	4			316.3	140.2	135.9	260.7	130.6	58.9	9	3
8	2	9	3			325.6	148.2	125.8	256.4	134.8	59.7	9	4
9	4	10	5			400.7	168.9	109.7	215.4	146.8	68.4	10	4
8	3	8	4			320.4	145.5	144.4	264.4	132.5	59.6	10	4
7	3	8	4			300.7	136.8	160.5	275	130.3	57	9	3
9	3	9	4			350.5	159.6	113.4	226	141.7	65.6	10	4
9	4	9	4			366.7	165.2	116.5	235.5	140.1	64.8	9	3
6	3	7	4			300.2	125.2	163.9	281.2	125.7	55.9	8	4
9	4	9	5			379.5	167.2	120.7	250	136.7	63.3	10	3
8	3	8	4			320.31	141.3	129.7	259.9	132.2	58.7	9	3

## Sheet: data2
RF arm
rest VAS		active VAS				SP		EP		IL-6		response
before	after	before	after			before	after	before	after	before	after	before	after
9	4	10	4			417.2	169.3	118.4	265.1	150	62.4	10	4
8	3	9	4			370.2	132.7	120.2	271.1	132.4	56.4	9	3
7	3	8	3			326.3	121.7	142.2	291.2	129.1	51.3	9	4
8	3	9	3			362.7	130.8	121.7	276.7	135.2	60.8	8	3
9	4	10	4			401.5	167.3	102.7	224.5	145.5	62.3	10	3
6	3	7	4			308.7	120.3	156.8	299.3	122.4	50.9	7	2
7	3	8	4			325.6	121.2	155.8	293.4	126.7	50.8	8	3
8	2	9	2			350.3	128.6	126.4	279.4	137.8	60.7	9	4
9	2	9	2			372.2	143.2	119.1	267.1	140.5	61.2	9	3
7	4	9	4			329.7	123.6	130.4	286.3	132.3	53.8	8	2
8	3	9	3			346.5	125.7	128.9	272.3	134.8	58.21	9	4
9	3	10	4			400.5	152.3	111.9	258.6	140.9	61.5	10	4
7	3	8	4			339.6	125.7	136.5	286.5	131.2	53.4	9	3
7	3	8	4			332.3	125.2	137.7	289.7	130.9	56.4	9	3
8	3	9	4			355.7	129.6	132.9	280.2	133.3	57.4	8	3
RN arm
rest VAS		active VAS				SP		EP		IL-6		response
before	after	before	after			before	after	before	after	before	after	before	after
8	2	9	2			372.3	118.7	108	291.4	141.8	43.51	10	3
8	2	9	2			369.1	115.6	110	299.1	138.9	42.3	9	2
7	2	8	2			344.3	111.1	143.7	358.7	131.6	39	9	2
8	2	9	2			367.5	114.4	117.1	300.4	137.4	41.8	10	3
6	1	7	2			330.3	108.6	164.1	402.3	128.6	35.9	9	2
8	2	9	2			365.2	113.7	119	305.2	136.8	40.8	9	2
8	2	9	2			355.2	113.5	119.7	302.4	136.5	40.5	9	3
7	2	8	2			341.7	110.5	135	353.6	131.2	37.4	8	2
9	3	9	3			376.5	119.6	102.4	289.7	142.7	46.7	10	3
7	1	8	2			333.5	109.6	125.4	350.7	130.4	36.3	8	2
9	2	10	3			415.6	122.4	98.9	275.8	150.4	47.9	9	2
9	2	10	3			400.6	120.3	100.3	288.9	144.9	47.6	9	2
8	2	9	3			351.1	112.5	121.3	325	135.6	39.8	8	2
8	2	8	2			350	112.3	122.6	349.7	132.9	39.6	8	2
7	1	8	2			345.6	112.1	160.3	400.1	129.7	36.2	7	3
